# Supplementary material for: A rational design of a cascaded DNA circuit for nanoparticle assembly and its application in the discrimination of single-base changes
Source: Royal Society of Chemistry journal article supplement (doi:10.1039/d2tb00155a), 2022-01-01
Supplement: d2tb00155a1.pdf [file d2tb00155a1.pdf]

## Rational design of cascaded DNA circuit for nanoparticle assembly and its application in discrimination of single-base changes

Bin Zheng,<sup>\*a</sup> Huaze Dong<sup>a</sup>, Jinmiao Zhu<sup>a</sup>, Qi Zhang<sup>a</sup>, Shiwei Yang<sup>a</sup> and Dongbao Yao<sup>\*b</sup>

a. School of Chemistry and Chemical Engineering, Hefei Normal University, Hefei, Anhui 230061, P.R. China. E-mail: zhengbin@hfnu.edu.cn; Tel:+86-551-63758370

b. Department of Polymer Science and Engineering, University of Science and Technology of China, Hefei, Anhui 230026, P. R. China. E-mail: dbyao@ustc.edu.cn

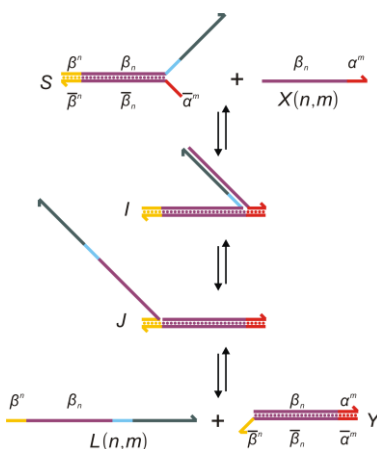

Fig. 1S The detailed illustration of the formation process as correct Catassembler is introduced.
